# Supplementary material for: 1H NMR Metabolite Monitoring during the Differentiation of Human Induced Pluripotent Stem Cells Provides New Insights into the Molecular Events That Regulate Embryonic Chondrogenesis
Source: MDPI journal article supplement (doi:10.3390/ijms23169266), 2022-08-17
Supplement: s1 [file s1]

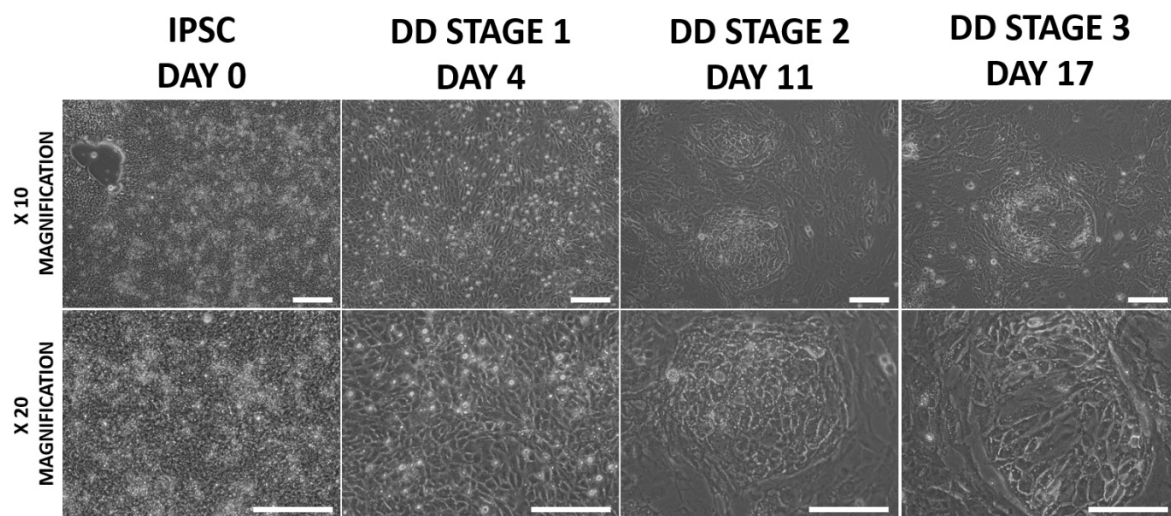

**Supplemental Figure S1. Morphology of cultures during directed differentiation (DD) of UKKi26a to chondrogenic cells.** Pluripotent UKKi26a cells maintained as feeder-free cultures formed a 2D monolayer of tightly-associated cells with high nucleus to cytoplasmic ratio and prominent nucleoli. At Stage 1 / day 4 of DD differentiating cells appeared more loosely associated, were larger and more spread-out. At Stage 2/ day 11 of DD mesenchymal condensations of cells were distributed through the cultures, which at Stage 3 / day 17 had matured to form 3D aggregates. Individual cells within the 3D aggregates had a rounded chondrogenic cell-like morphology and were embedded in lacunae-like structures surrounded by extracellular matrix. Scale bars = 50µm.

## SAFRANIN O DIRECTED DIFFERENTIATION STAGE 3 DAY 17

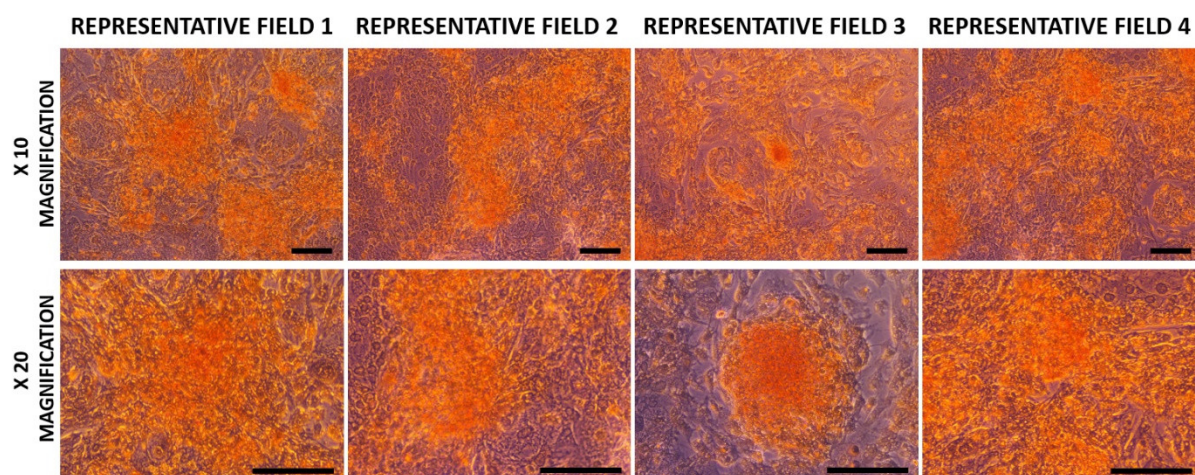

Supplemental Figure S2. Safranin O staining of UKKi26a-chondrogenic cells at Stage 3 / day 17 of **directed differentiation (DD)**. Representative images of DD cultures at Stage 3/ day 17 were positive for extracellular matrix (ECM)-specific staining with safranin O, indicative of the presence of highly-sulphated proteoglycans. Scale bars = 50 $\mu$ m.

## COLLAGEN II DIRECTED DIFFERENTIATION STAGE 3 DAY 17

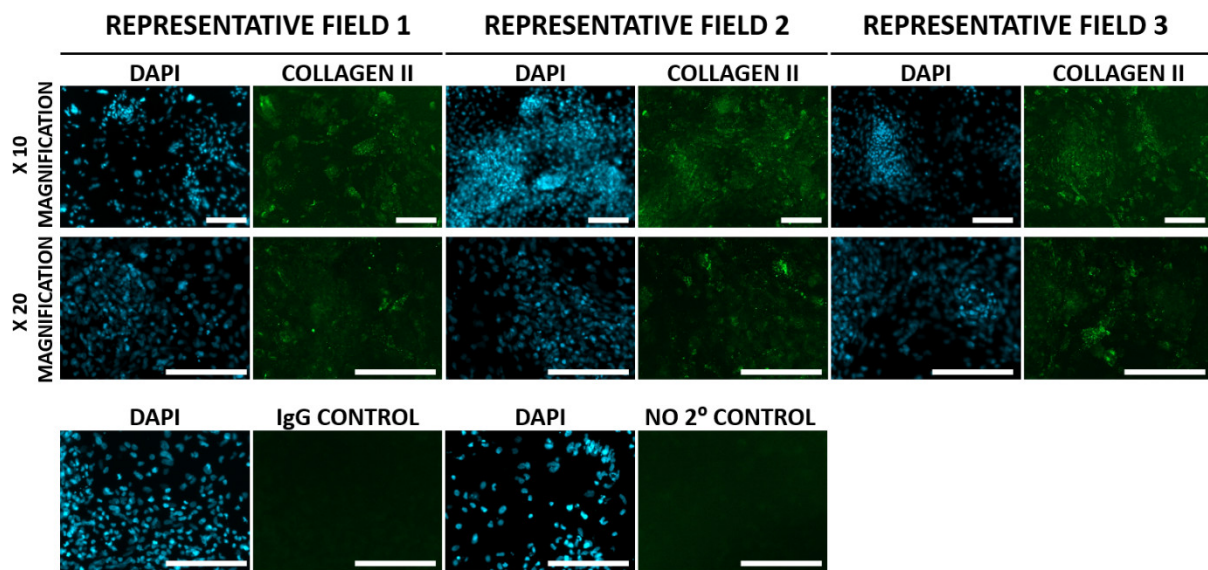

**Supplemental Figure S3. Collagen type II immunolabelling of UKKi26a-chondrogenic cells at Stage 3 / day 17 of directed differentiation (DD).** Representative images of DD cultures at Stage 3 / day 17 showed positive deposition of cartilage-specific collagen type II within the extracellular matrix (ECM) of cultures. Collagen type II immunolabelling (green) was counter-stained with 4',6-diamidino-2-phenylindole (DAPI) (DAPI; blue) to identify cell nuclei and serve as a reference to collagen type II deposition within the ECM. Controls for immunolabelling reactions were performed in parallel as a primary IgG isotype control and a no secondary antibody control. Scale bars = 50µm.

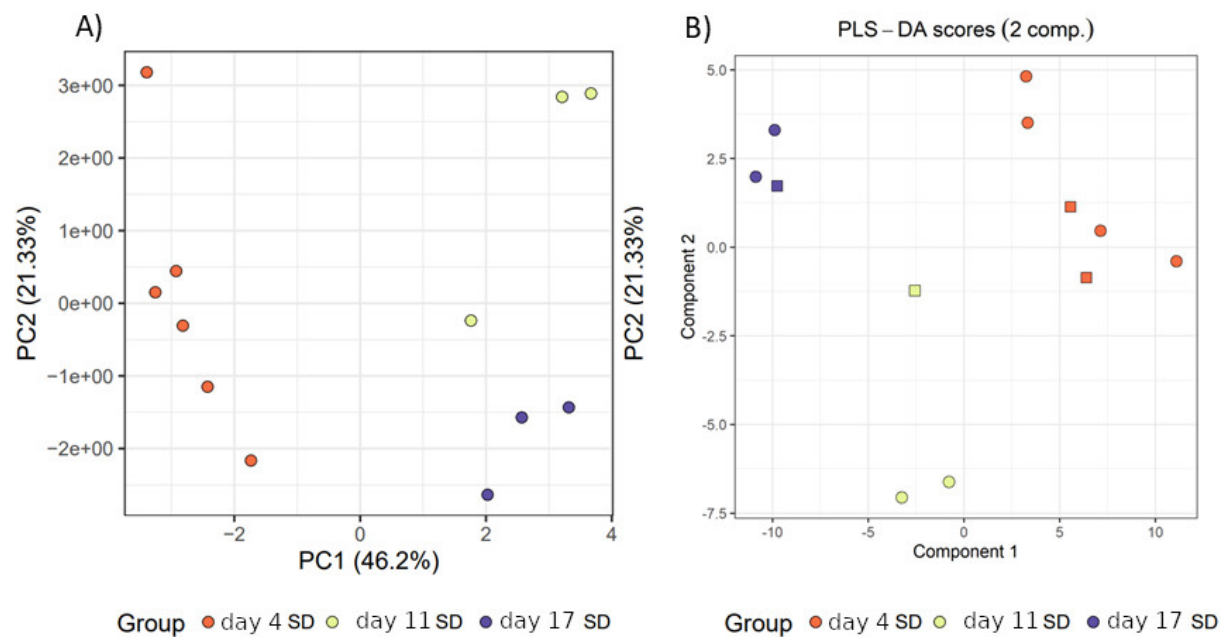

**Supplemental Figure S4.** PCA of extracellular metabolite profiles spontaneously differentiating cells at day 4 (equivalent to stage 1; n=6), day 11 (equivalent to stage 2; n=3) and day 17 (equivalent to stage 3; n=3). Circles or squares indicate the split of data between training and testing, respectively, for predictive PLS-DA models.

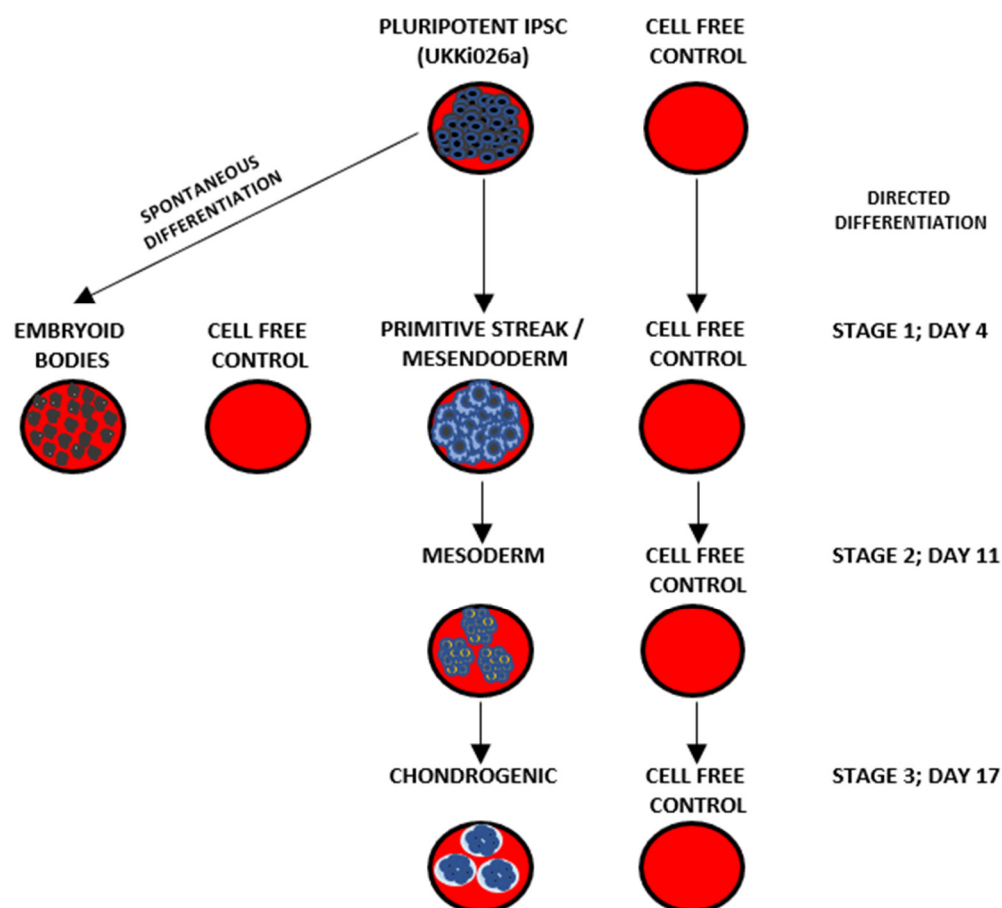

**Supplemental Figure S5. Schema showing experimental design of cell culture process including differentiation of pluripotent IPSC and cell free controls.** Pluripotent IPSC line UKKi026a was cultured as a homogeneous monolayer culture. Directed differentiation (DD) of pluripotent IPSC was performed by culture in a chemically-defined base medium temporally supplemented with combinations of growth factors and serial passage on defined matrix substrates (Supplemental Table 1). Comparative analysis between DD and spontaneous differentiation was performed by establishing parallel cultures of embryoid bodies from the same culture of IPSCs. Cell free controls consisting of the exact same culture conditions through differentiation pathways were established in parallel to ensure that any background molecular signature arising from plastics, matrix and media was constant across all experiments. Cell cultures and cell free controls were taken for analysis as follows: pluripotent IPSC; DD Stage 1 (primitive streak/ mesendoderm), day 4; DD Stage 2 (mesoderm), day 11; DD Stage 3 (chondrogenic cells) day 17; spontaneous differentiation (embryoid bodies).

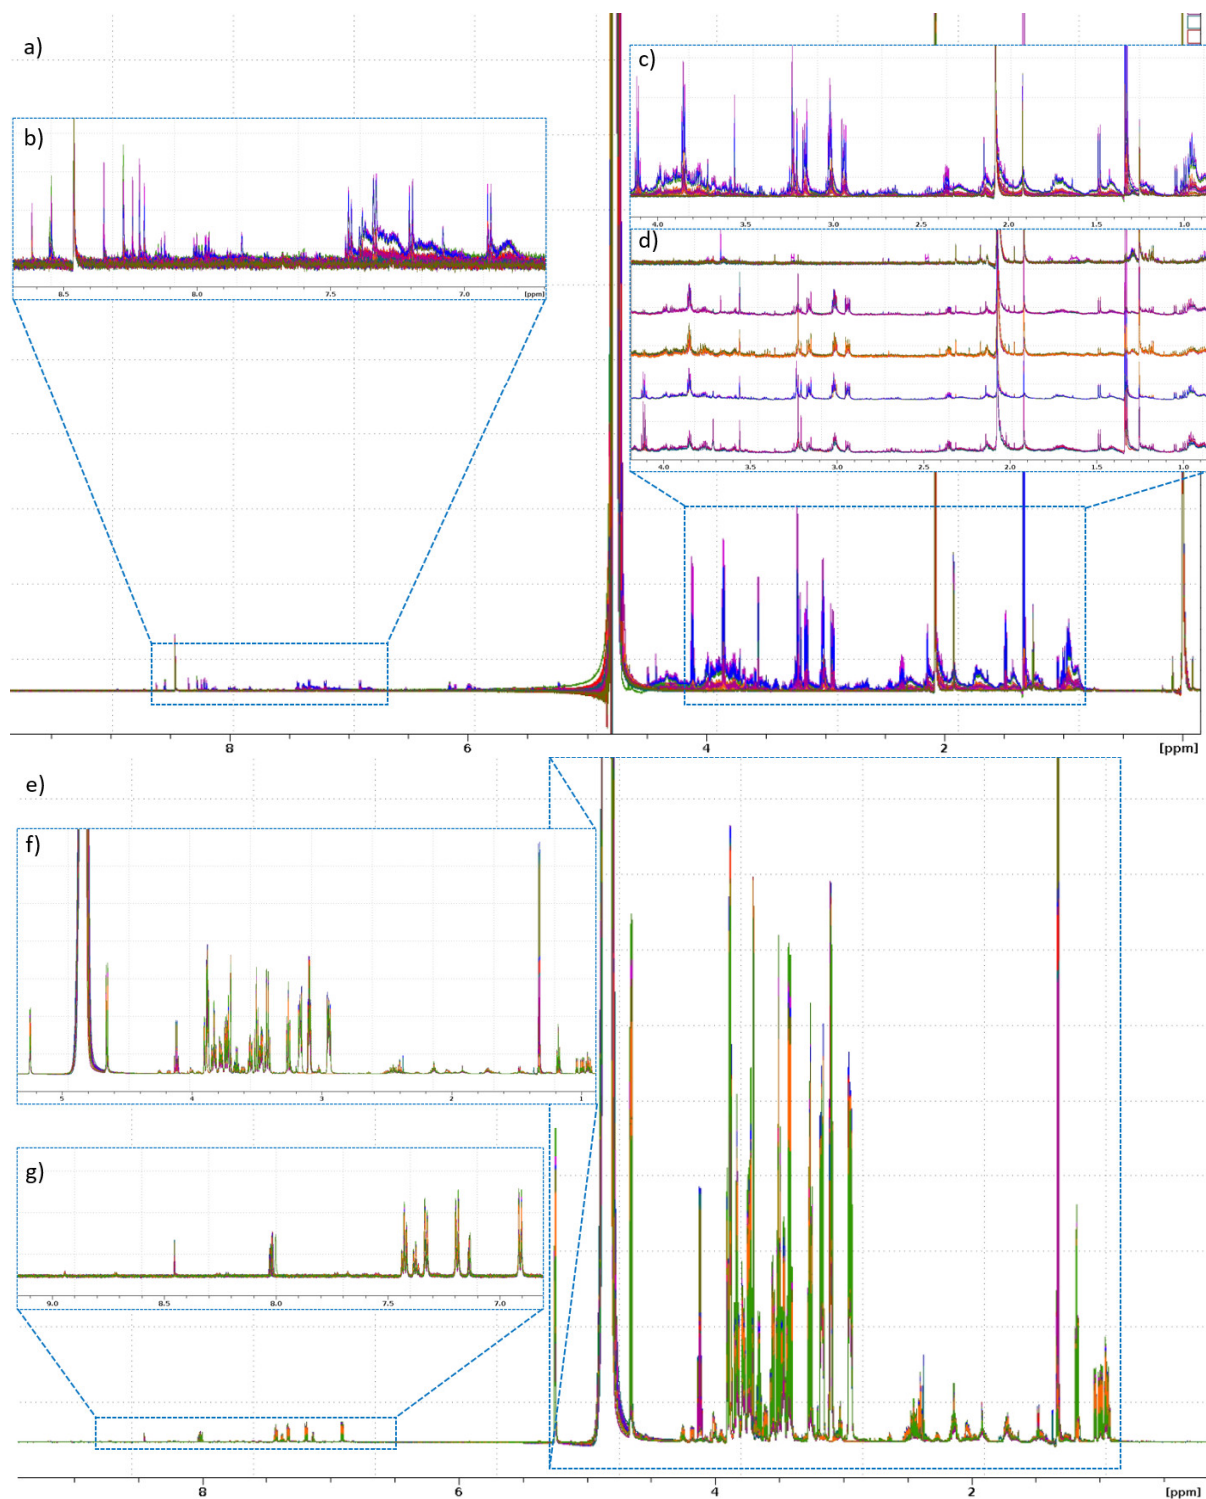

**Supplemental Figure S6. Representative  $^1\text{H}$  NMR Spectra of Intracellular and Extracellular Metabolites** top panel and inserts – a-d) cell extract NMR spectra; a) full  $^1\text{H}$  NMR spectrum of entire intracellular dataset overlaid b) insert x8 magnification aromatic region (8.8-6.7ppm), c) insert of aliphatic region (5.3-0.9ppm), d) insert of aliphatic region -stacked for each group (bottom-to-top; IPSCs, DD stage1, DD stage2, DD stage3, SD (all stages)). e-g) cell media NMR spectra; e) full  $^1\text{H}$  NMR spectrum of entire intracellular dataset overlaid f) insert x8 magnification aromatic region (8.8-6.7ppm), g) insert of aliphatic region (5.3-0.9 ppm).

a)

Empirical p value:  $p < 5e-04$  (0/2000)

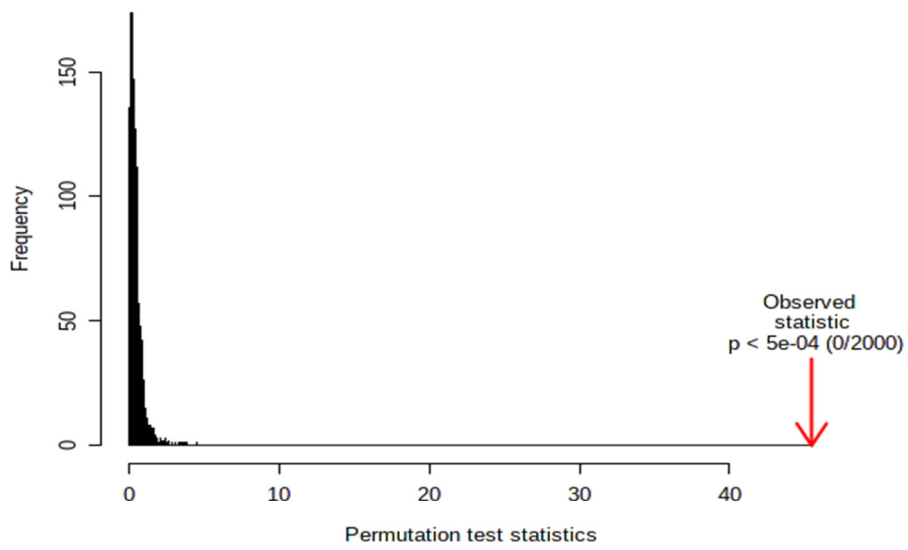

b)

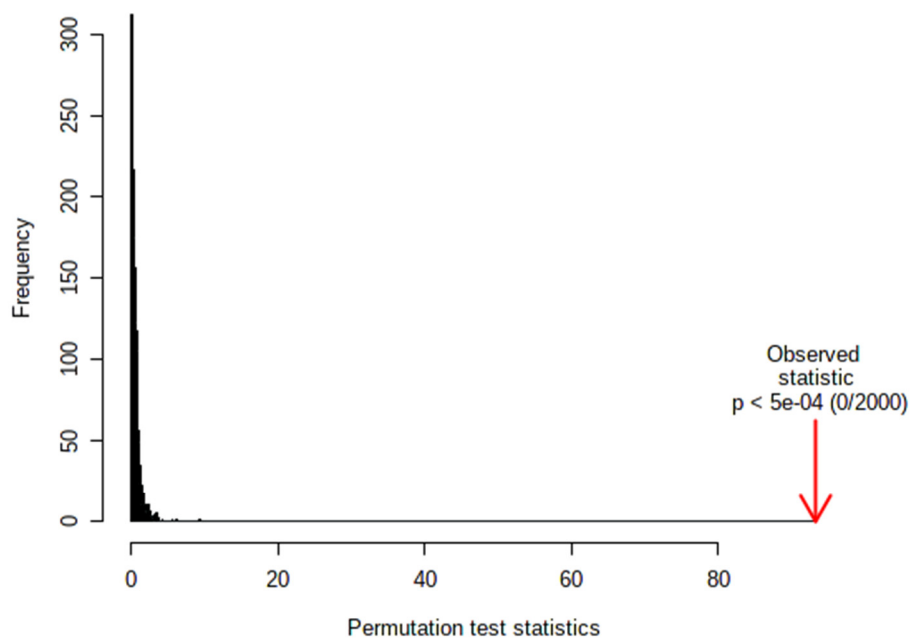

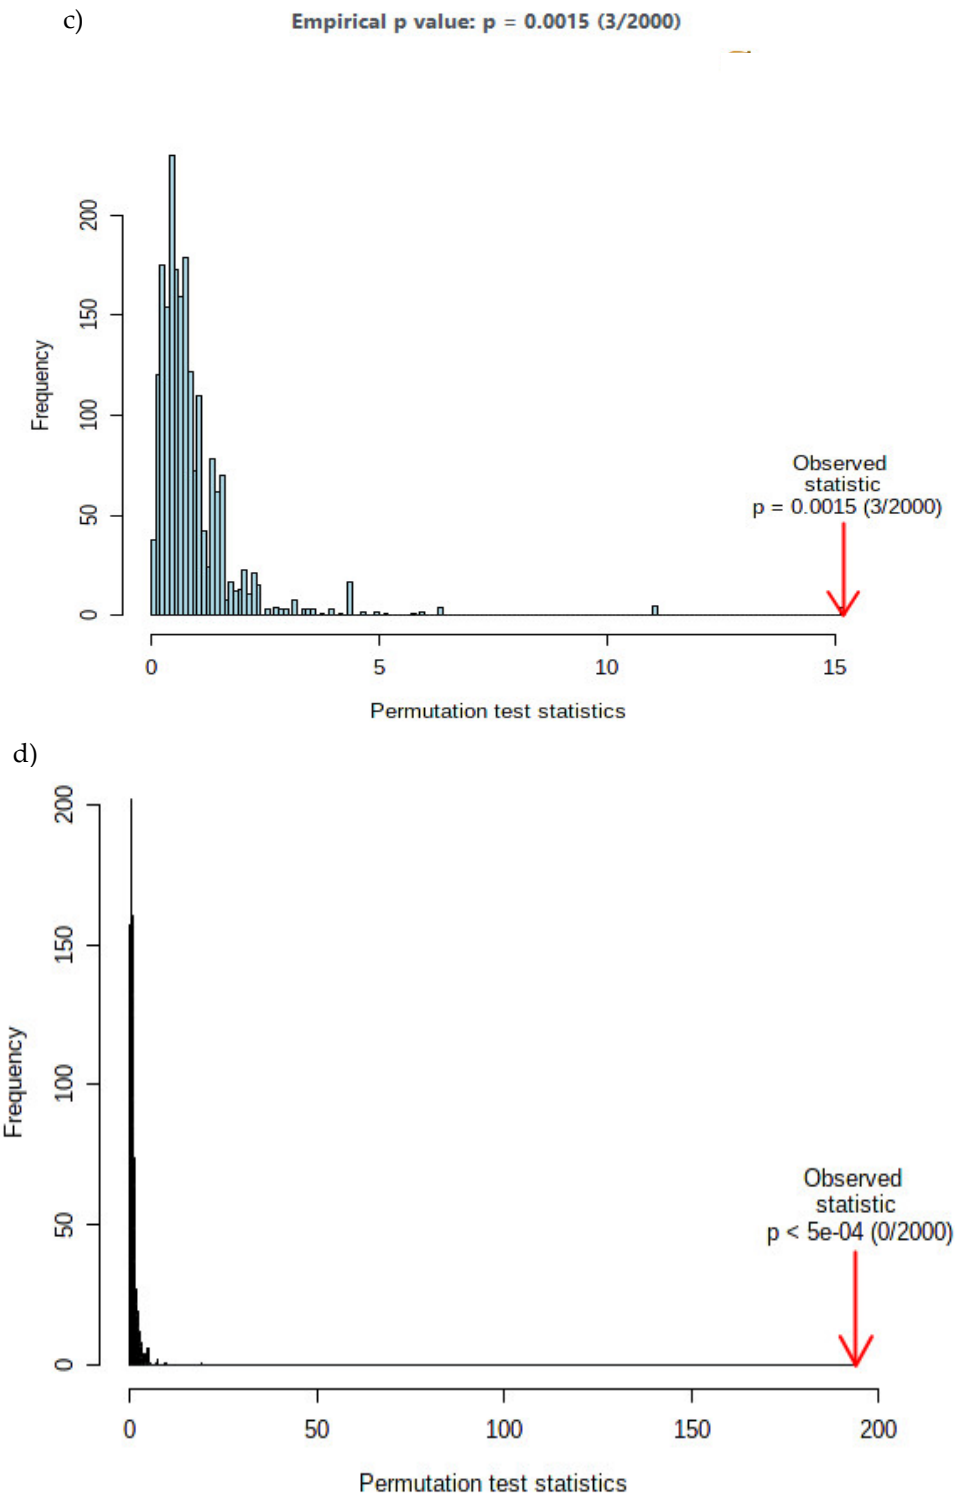

**Supplemental Figure S7. Validation of PLS-DA scores** PLS-DA models were validated using receiver operator characteristic (ROC) scores and 2000 permutations per model. Supplemental Figure 7a) PLS-DA Permutation testing Intracellular IPSC, DD-S1, DD-S2, DD-S3 (complements Figure 1c,. Supplemental Figure 7b) PLS-DA Permutation testing Extracellular IPSC, DD-S1, SD-S1 (complements Figure 1 d). Supplemental Figure 7c) PLS-DA Permutation testing Intracellular IPSC, DD-S1, SD-S1 (complements Figure 3 c). Supplemental Figure 7d) PLS-DA Permutation testing Extracellular IPSC, DD-S1, DD-S2, DD-S3 (complements Figure 3 d).

**Supplemental Table S1. Metabolite Annotations for Intra and Extracellular Metabolic Profiles.** Metabolites denoted with asterisks are the subset of methyl containing (high sensitivity) metabolites monitored in the spontaneous differentiation.

| Intracellular Extracts |             |        | Extracellular Extracts |             |        |
|------------------------|-------------|--------|------------------------|-------------|--------|
| Metabolite Name        | HMDB code   | KEGG   | Metabolite Name        | HMDB code   | KEGG   |
| 2-Aminobutyrate*       | HMDB0000650 | C02261 | 5-Aminolevulinate      | HMDB0001149 | C00430 |
| 2-Hydroxybutyrate      | HMDB0000008 | C05984 | Acetate                | HMDB0000042 | C00033 |
| 2-Methylglutarate*     | HMDB0000422 | NA     | Dimethylamine          | HMDB0000087 | C00543 |
| Acetate*               | HMDB0000042 | C00033 | Citrate                | HMDB0000094 | C00158 |
| Acetone                | HMDB0001659 | C00207 | Choline                | HMDB0000097 | C00114 |
| Acetylcholine          | HMDB0000895 | C01996 | Ethanol                | HMDB0000108 | C00469 |
| Adenosine              | HMDB0000050 | C00212 | Glucose                | HMDB0000122 | C00221 |
| Adenylhomocysteine     | HMDB0000939 | C00021 | Glycine                | HMDB0000123 | C00037 |
| Alanine*               | HMDB0000161 | C00041 | Glutathione            | HMDB0000125 | NA     |
| Alloleucine*           | HMDB0000687 | C00123 | Formate                | HMDB0000142 | C00058 |
| ATP                    | HMDB0000538 | C00002 | Glutamate              | HMDB0000148 | C00025 |
| Citrate                | HMDB0000094 | C00158 | Tyrosine               | HMDB0000158 | C00082 |
| Creatine phosphate     | HMDB0001511 | C02305 | Phenylalanine          | HMDB0000159 | C00079 |
| Creatinine             | HMDB0000562 | C00791 | Alanine                | HMDB0000161 | C00041 |
| Deoxyadenosine         | HMDB0000101 | C00559 | Proline                | HMDB0000162 | C00148 |
| Dimethylamine          | HMDB0000087 | C00543 | Threonine              | HMDB0000167 | C00188 |
| Ethanol*               | HMDB0000108 | C00469 | Isoleucine             | HMDB0000172 | C00407 |
| Folate                 | HMDB0000121 | C00504 | Histidine              | HMDB0000177 | C00135 |
| Formate                | HMDB0000142 | C00058 | Lysine                 | HMDB0000182 | C00047 |
| Glucose                | HMDB0000122 | C00221 | Serine                 | HMDB0000187 | C00065 |
| Glucose-6-phosphate    | HMDB0001401 | C00092 | Lactate                | HMDB0000190 | C00186 |
| Glutamate              | HMDB0000148 | C00025 | Aspartate              | HMDB0000191 | C00049 |
| Glutamine              | HMDB0000641 | C00064 | Cysteine               | HMDB0000192 | C00491 |
| Glycerophosphocholine  | HMDB0000086 | C00670 | Myo inositol           | HMDB0000211 | C00137 |
| Glycine                | HMDB0000123 | C00037 | Pyruvate               | HMDB0000243 | C00022 |
| Histamine              | HMDB0000870 | C00388 | Pyroglutamate          | HMDB0000267 | C01879 |
| Histidine              | HMDB0000177 | C00135 | Arginine               | HMDB0000517 | C00062 |
| Homocysteine           | HMDB0000676 | C01817 | Creatine               | HMDB0000562 | C00791 |
| Hydroxyvalerate*       | HMDB0000754 | C20827 | Glutamine              | HMDB0000641 | C00064 |
| Indoleacetic acid      | HMDB0000197 | C00954 | 2-Aminobutyrate        | HMDB0000650 | C02261 |
| Inosine                | HMDB0000195 | C00294 | Fructose               | HMDB0000660 | C02336 |
| Inosinic acid          | HMDB0000175 | C00130 | Leucine                | HMDB0000687 | C00123 |
| Isoleucine*            | HMDB0000172 | C00407 | Methionine             | HMDB0000696 | C00073 |
| Ketoleucine*           | HMDB0000695 | C00233 | Homocysteine           | HMDB0000742 | C00155 |
| Lactate*               | HMDB0000190 | C00186 | Oxypurinol             | HMDB0000786 | C07599 |
| Leucine*               | HMDB0000557 | NA     | Valine                 | HMDB0000883 | C00183 |

|                        |             |        |                               |             |        |
|------------------------|-------------|--------|-------------------------------|-------------|--------|
| <b>Lysine*</b>         | HMDB0000182 | C00047 | <b>Acetylcholine</b>          | HMDB0000895 | C01996 |
| <b>Malonate</b>        | HMDB0000691 | C04025 | <b>NAD+</b>                   | HMDB0000902 | C00003 |
| <b>Methionine</b>      | HMDB0000696 | C00073 | <b>Trimethylamine-N-oxide</b> | HMDB0000925 | C01104 |
| <b>Methylamine</b>     | HMDB0000164 | C00218 | <b>Threonate</b>              | HMDB0000943 | C01620 |
| <b>Methylhistidine</b> | HMDB0000001 | C01152 | <b>Phosphocreatine</b>        | HMDB0001511 | C02305 |
| <b>Myo-insitol</b>     | HMDB0000211 | C00137 | <b>Methylguanidine</b>        | HMDB0001522 | C02294 |
| <b>NAD+</b>            | HMDB0000902 | C00003 | <b>Dimethylxanthine</b>       | HMDB0001860 | C13747 |
| <b>NADP+</b>           | HMDB0000217 | C00006 | <b>Methanol</b>               | HMDB0001875 | C00132 |
| <b>Niacinamide</b>     | HMDB0001406 | C00153 | <b>Dimethylsulphate</b>       | HMDB0002303 | C00580 |
| <b>Oxypurinol</b>      | HMDB0000786 | C07599 | <b>Dimethylurate</b>          | HMDB0011103 | C16356 |
| <b>Phenylacetate</b>   | HMDB0000209 | C07086 |                               |             |        |
| <b>phenylalanine</b>   | HMDB0000159 | C00079 |                               |             |        |
| <b>Pyroglutamate</b>   | HMDB0000267 | C01879 |                               |             |        |
| <b>Pyruvate</b>        | HMDB0000243 | C00022 |                               |             |        |
| <b>Succinate</b>       | HMDB0000254 | C00042 |                               |             |        |
| <b>Sucrose</b>         | HMDB0000258 | C00089 |                               |             |        |
| <b>Taurine</b>         | HMDB0000251 | C00245 |                               |             |        |
| <b>Threonine</b>       | HMDB0000167 | C00188 |                               |             |        |
| <b>Tyrosine</b>        | HMDB0000158 | C00082 |                               |             |        |
| <b>Valine*</b>         | HMDB0000883 | C00183 |                               |             |        |
| <b>Xanthine</b>        | HMDB0000292 | C00385 |                               |             |        |

**Supplemental Table S2.** Chemical shift variable boundaries for metabolite binning.

| Extracellular Bin Boundary/Metabolite Annotation |                           |                      |         | Intracellular Bin Boundary/Metabolite Annotation |                           |                      |                             |
|--------------------------------------------------|---------------------------|----------------------|---------|--------------------------------------------------|---------------------------|----------------------|-----------------------------|
| Database Identifier                              | Metabolite Identification | Chemical Shift (ppm) | Overlap | Database Identifier                              | Metabolite Identification | Chemical Shift (ppm) | Overlap                     |
|                                                  |                           | [8.9579...8.9298]    |         |                                                  |                           | [8.9514...8.9338]    |                             |
|                                                  |                           | [8.7354...8.7004]    |         | HMDB0001406                                      | Niacinamide               | [8.7327...8.71]      |                             |
| HMDB0000142                                      | Formic acid               | [8.4632...8.4401]    |         |                                                  |                           | [8.6241...8.6042]    |                             |
| HMDB0000786                                      | Oxypurinol                | [8.2752...8.2422]    |         | HMDB0000175                                      | Inosinic acid             | [8.558...8.5276]     |                             |
| HMDB0000902                                      | NAD                       | [8.2289...8.1938]    |         | HMDB0000142                                      | Formic acid               | [8.4678...8.446]     |                             |
| HMDB0000177                                      | L-Histidine               | [8.0037...7.9876]    |         | HMDB0000101                                      | Deoxyadenosine            | [8.3558...8.335]     |                             |
|                                                  |                           | [7.9114...7.9002]    |         | HMDB0000538                                      | Adenosine triphosphate    | [8.3219...8.3125]    |                             |
|                                                  |                           | [7.7411...7.7142]    |         | HMDB0000786                                      | Oxypurinol                | [8.2804...8.2661]    |                             |
|                                                  |                           | [7.6858...7.6694]    |         | HMDB0000050                                      | Adenosine                 | [8.2465...8.2348]    |                             |
|                                                  |                           | [7.6196...7.5793]    |         | HMDB0000902                                      | NAD                       | [8.2199...8.2056]    |                             |
|                                                  |                           | [7.5637...7.5308]    |         | HMDB0000217                                      | NADP                      | [8.2028...8.1904]    |                             |
| HMDB0000159                                      | L-Phenylalanine           | [7.4429...7.4076]    |         |                                                  |                           | [8.1652...8.11]      |                             |
| HMDB0000159                                      | L-Phenylalanine           | [7.3891...7.3575]    |         |                                                  |                           | [8.0186...8.0083]    |                             |
| HMDB0000159                                      | L-Phenylalanine           | [7.3442...7.3091]    |         | HMDB0000001                                      | 1-Methylhistidine         | [8.0076...8.0041]    |                             |
|                                                  |                           | [7.2986...7.2614]    |         | HMDB0000939                                      | S-Adenosylhomocysteine    | [8.0004...7.9744]    |                             |
| HMDB0000158                                      | L-Tyrosine                | [7.2067...7.1716]    |         | HMDB0000177                                      | L-Histidine               | [7.9743...7.9444]    | overlapped with HMDB0000195 |
| HMDB0000177                                      | L-Histidine               | [7.1464...7.12]      |         | HMDB0000292                                      | Xanthine                  | [7.8891...7.8665]    |                             |
| HMDB0000158                                      | L-Tyrosine                | [6.9232...6.892]     |         | HMDB0000870                                      | Histamine                 | [7.8476...7.825]     |                             |
| HMDB0000122                                      | D-Glucose                 | [5.2626...5.2228]    |         |                                                  |                           | [7.6883...7.6737]    |                             |
| HMDB0000167                                      | L-Threonine               | [4.2713...4.2123]    |         | HMDB0000121                                      | Folic acid                | [7.6118...7.586]     |                             |
| HMDB0000267                                      | Pyroglutamic acid         | [4.1979...4.1576]    |         |                                                  |                           | [7.5564...7.5331]    |                             |

|             |                       |                   |                                                                                |             |                        |                   |                                |
|-------------|-----------------------|-------------------|--------------------------------------------------------------------------------|-------------|------------------------|-------------------|--------------------------------|
| HMDB0001149 | 5-Aminolevulinic acid | [4.1499...4.142]  |                                                                                | HMDB0000159 | L-Phenylalanine        | [7.452...7.4174]  |                                |
| HMDB0000190 | L-Lactic acid         | [4.1376...4.0975] | overlapped with<br>HMDB0000192,<br>HMDB0000162                                 | HMDB0000159 | L-Phenylalanine        | [7.3959...7.3772] |                                |
| HMDB0000660 | D-Fructose            | [4.095...4.0877]  |                                                                                |             |                        | [7.3958...7.3646] |                                |
| HMDB0000211 | Myoinositol           | [4.0857...4.055]  |                                                                                | HMDB0000159 | L-Phenylalanine        | [7.3466...7.323]  |                                |
| HMDB0000562 | Creatinine            | [4.0549...4.048]  |                                                                                |             |                        | [7.319...7.2135]  |                                |
| HMDB0000660 | D-Fructose            | [4.0367...4.0276] |                                                                                | HMDB0000158 | L-Tyrosine             | [7.2093...7.1882] |                                |
| HMDB0000660 | D-Fructose            | [4.0194...4.0118] |                                                                                |             |                        | [7.1841...7.09]   |                                |
| HMDB0000187 | L-Serine              | [4.0116...4.0045] | overlapped with<br>HMDB0000943                                                 | HMDB0000001 | 1-Methylhistidine      | [7.0872...7.0714] |                                |
| HMDB0000660 | D-Fructose            | [4.0018...3.9787] | overlapped with<br>HMDB0000159,<br>HMDB0000177                                 | HMDB0000158 | L-Tyrosine             | [6.9179...6.892]  |                                |
|             |                       | [3.9683...3.9622] |                                                                                |             |                        | [6.8737...6.797]  |                                |
| HMDB0001511 | Phosphocreatine       | [3.9619...3.9424] |                                                                                |             |                        | [6.5249...6.5192] |                                |
| HMDB0000158 | L-Tyrosine            | [3.9422...3.9171] | overlapped with<br>HMDB0000192                                                 | HMDB0000538 | Adenosine triphosphate | [6.1629...6.1449] | overlapped with<br>HMDB0000175 |
| HMDB0000191 | L-Aspartic acid       | [3.9116...3.9043] |                                                                                | HMDB0000195 | Inosine                | [6.1148...6.0973] |                                |
| HMDB0000122 | D-Glucose             | [3.9006...3.8934] | overlapped with<br>HMDB0000191,<br>HMDB0000660,<br>HMDB0000742,<br>HMDB0000317 |             |                        | [6.01...5.9989]   |                                |
| HMDB0000660 | D-Fructose            | [3.892...3.8808]  | overlapped with<br>HMDB0000742,                                                |             |                        | [5.9987...5.9669] |                                |

|             |               |                   |                                                                 |             |                       |                   |  |
|-------------|---------------|-------------------|-----------------------------------------------------------------|-------------|-----------------------|-------------------|--|
|             |               |                   | HMDB0000191,<br>HMDB0000317                                     |             |                       |                   |  |
| HMDB0000122 | D-Glucose     | [3.8805...3.859]  | overlapped with<br>HMDB0000660,<br>HMDB0000742                  |             |                       | [4.4482...4.4257] |  |
| HMDB0000696 | L-Methionine  | [3.8613...3.8541] |                                                                 |             |                       | [4.4256...4.4162] |  |
| HMDB0000122 | D-Glucose     | [3.8522...3.84]   | overlapped with<br>HMDB0000696                                  |             |                       | [4.4095...4.393]  |  |
| HMDB0000122 | D-Glucose     | [3.8398...3.8106] |                                                                 |             |                       | [4.3929...4.3715] |  |
| HMDB0000161 | L-Alanine     | [3.8055...3.7958] |                                                                 | HMDB0000086 | Glycerophosphocholine | [4.3508...4.267]  |  |
| HMDB0000517 | L-Arginine    | [3.7047...3.7793] | overlapped with<br>HMDB0000660                                  | HMDB0000167 | L-Threonine           | [4.2666...4.2287] |  |
| HMDB0000161 | L-Alanine     | [3.7792...3.7703] | overlapped with<br>HMDB0000660,<br>HMDB0000122,<br>HMDB0000641, | HMDB0000267 | Pyroglutamic acid     | [4.2006...4.1525] |  |
| HMDB0000641 | L-Glutamine   | [3.7702...3.7609] |                                                                 |             |                       | [4.1524...4.1424] |  |
| HMDB0000641 | L-Glutamine   | [3.7608...3.752]  | overlapped with<br>HMDB0000161,<br>HMDB0000122                  | HMDB0000190 | L-Lactic acid         | [4.1385...4.0893] |  |
|             |               | [3.7519...3.7454] |                                                                 | HMDB0000562 | Creatinine            | [4.082...4.0712]  |  |
| HMDB0000122 | D-Glucose     | [3.7443...3.7145] | overlapped with<br>HMDB0000517                                  | HMDB0000211 | Myoinositol           | [4.0711...4.0506] |  |
| HMDB0000122 | D-Glucose     | [3.7121...3.6933] | overlapped with<br>HMDB0000660                                  | HMDB0000863 | Isopropyl alcohol     | [4.0505...3.9985] |  |
| HMDB0000943 | Threonic acid | [3.69...3.6797]   |                                                                 | HMDB0000211 | Myoinositol           | [3.9984...3.9756] |  |

|             |               |                   |                                                |              |                 |                   |                                                                |
|-------------|---------------|-------------------|------------------------------------------------|--------------|-----------------|-------------------|----------------------------------------------------------------|
| HMDB0000943 | Threonic acid | [3.6827...3.6763] | overlapped with<br>HMDB0000172,<br>HMDB0000660 | HMDB0001511  | Phosphocreatine | [3.9737...3.9233] | overlapped with<br>HMDB0000159                                 |
|             |               | [3.6762...3.6668] |                                                | HMDB00000122 |                 | [3.923...3.9008]  |                                                                |
| HMDB0000943 | Threonic acid | [3.6646...3.6453] | overlapped with<br>HMDB0000660,<br>HMDB0000108 | HMDB0000676  | L-Homocystine   | [3.9007...3.8707] | overlapped with<br>HMDB00000122                                |
| HMDB0000211 | Myoinositol   | [3.645...3.6374]  | overlapped with<br>HMDB0000943                 | HMDB0000258  | Sucrose         | [3.8706...3.8406] | overlapped with<br>HMDB0000012,<br>HMDB0000740                 |
| HMDB0000211 | Myoinositol   | [3.6321...3.6015] | overlapped with<br>HMDB0000883                 |              |                 | [3.8396...3.8316] |                                                                |
| HMDB0000167 | L-Threonine   | [3.6041...3.59]   |                                                |              |                 | [3.831...3.8261]  |                                                                |
| HMDB0000660 | D-Fructose    | [3.572...3.5636]  |                                                |              |                 | [3.826...3.819]   |                                                                |
| HMDB0000123 | Glycine       | [3.5609...3.5562] |                                                | HMDB0000740  | Lactulose       | [3.817...3.7981]  | overlapped with<br>HMDB00000122                                |
| HMDB0000122 | D-Glucose     | [3.5548...3.5489] | overlapped with<br>HMDB0000211                 | HMDB0000740  | Lactulose       | [3.7972...3.7546] | overlapped with<br>HMDB0000012,<br>HMDB0000182                 |
| HMDB0000122 | D-Glucose     | [3.5462...3.5344] | overlapped with<br>HMDB0000660                 | HMDB0000211  | Myoinositol     | [3.7532...3.7361] | overlapped with<br>HMDB0000012,<br>HMDB0000182,<br>HMDB0000172 |
| HMDB0000122 | D-Glucose     | [3.5296...3.5232] | overlapped with<br>HMDB0000211                 | HMDB00000023 |                 | [3.7349...3.6987] | overlapped with<br>HMDB0000012,<br>HMDB0000211                 |

|             |                       |                   |                                                 |              |                     |                   |                                                  |
|-------------|-----------------------|-------------------|-------------------------------------------------|--------------|---------------------|-------------------|--------------------------------------------------|
| HMDB0000122 | D-Glucose             | [3.5206...3.3885] |                                                 | HMDB0000258  | Sucrose             | [3.6986...3.6599] | overlapped with<br>HMDB00000012,<br>HMDB00000211 |
| HMDB0000192 | L-Cystine             | [3.3909...3.382]  |                                                 | HMDB0000197  | Indoleacetic acid   | [3.6598...3.6015] | overlapped with<br>HMDB00000012,<br>HMDB00000211 |
| HMDB0000162 | L-Proline             | [3.377...3.364]   |                                                 | HMDB0000167  | L-Threonine         | [3.6014...3.5872] |                                                  |
| HMDB0000192 | L-Cystine             | [3.3637...3.3541] | overlapped with<br>HMDB0000162                  |              |                     | [3.5863...3.5653] |                                                  |
| HMDB0001875 | Methanol              | [3.3534...3.3465] |                                                 | HMDB0000123  | Glycine             | [3.5652...3.5545] | overlapped with<br>HMDB000000122                 |
| HMDB0000162 | L-Proline             | [3.3459...3.3421] |                                                 | HMDB00000122 |                     | [3.5536...3.521]  |                                                  |
| HMDB0000162 | L-Proline             | [3.342...3.338]   |                                                 | HMDB0000209  | Phenylacetic acid   | [3.5207...3.5143] | overlapped with<br>HMDB000000023                 |
| HMDB0000162 | L-Proline             | [3.3362...3.3305] |                                                 | HMDB0001401  | Glucose 6-phosphate | [3.5125...3.5046] | overlapped with<br>HMDB000000122                 |
| HMDB0001860 | Paraxanthine          | [3.3278...3.3203] |                                                 |              |                     | [3.5045...3.4998] |                                                  |
| HMDB0011103 | 1,7-Dimethyluric acid | [3.3202...3.3145] |                                                 | HMDB0001401  | Glucose 6-phosphate | [3.4991...3.4924] | overlapped with<br>HMDB000000122                 |
| HMDB0000211 | Myoinositol           | [3.3121...3.3028] |                                                 | HMDB00000122 |                     | [3.4906...3.478]  |                                                  |
| HMDB0000159 | L-Phenylalanine       | [3.3015...3.296]  |                                                 | HMDB00000122 |                     | [3.4773...3.455]  |                                                  |
| HMDB0000211 | Myoinositol           | [3.2959...3.2905] | overlapped with<br>HMDB0000159                  |              |                     | [3.4518...3.44]   |                                                  |
| HMDB0000122 | D-Glucose             | [3.2754...3.645]  | overlapped with<br>HMDB00000211,<br>HMDB0000159 |              |                     | [3.435...3.376]   |                                                  |

|             |                        |                   |                                                |              |                       |                   |                                 |
|-------------|------------------------|-------------------|------------------------------------------------|--------------|-----------------------|-------------------|---------------------------------|
| HMDB0000122 | D-Glucose              | [3.2625...3.2506] | overlapped with<br>HMDB0000177                 | HMDB0000001  | 1-Methylhistidine     | [3.3639...3.3556] |                                 |
| HMDB0000925 | Trimethylamine N-oxide | [3.2482...3.2403] | overlapped with<br>HMDB0000517,<br>HMDB0000177 | HMDB0000211  | Myoinositol           | [3.305...3.2662]  |                                 |
| HMDB0000517 | L-Arginine             | [3.2396...3.2319] | overlapped with<br>HMDB0000177,<br>HMDB0000192 | HMDB0000159  | L-Phenylalanine       | [3.2659...3.244]  |                                 |
| HMDB0000192 | L-Cystine              | [3.2296...3.2207] | overlapped with<br>HMDB0000158,<br>HMDB0000517 | HMDB00000122 |                       | [3.242...3.228]   |                                 |
| HMDB0000895 | Acetylcholine          | [3.2135...3.2038] |                                                | HMDB0000251  | Taurine               | [3.2278...3.2194] | overlapped with<br>HMDB00000122 |
| HMDB0000192 | L-Cystine              | [3.2038...3.196]  |                                                | HMDB0000086  | Glycerophosphocholine | [3.2178...3.2141] |                                 |
| HMDB0000097 | Choline                | [3.1943...3.1855] | overlapped with<br>HMDB0000192,<br>HMDB0000158 | HMDB0000895  | Acetylcholine         | [3.2118...3.2028] |                                 |
| HMDB0000158 | L-Tyrosine             | [3.1845...3.1783] |                                                |              |                       | [3.1923...3.1854] |                                 |
| HMDB0000192 | L-Cystine              | [3.1782...3.1737] |                                                |              |                       | [3.1839...3.1417] |                                 |
| HMDB0000177 | L-Histidine            | [3.1736...3.153]  |                                                |              |                       | [3.1414...3.135]  |                                 |
| HMDB0002303 | Dimethylsulfide        | [3.1485...3.1432] |                                                | HMDB0000691  | Malonic acid          | [3.1334...3.1267] |                                 |
| HMDB0000177 | L-Histidine            | [3.1388...3.1335] | overlapped with<br>HMDB0000159                 |              |                       | [3.1262...3.1214] |                                 |
| HMDB0000177 | L-Histidine            | [3.1334...3.1267] | overlapped with<br>HMDB0000159                 | HMDB0000159  | L-Phenylalanine       | [3.1213...3.0967] |                                 |
| HMDB0000159 | L-Phenylalanine        | [3.1266...3.1214] |                                                |              |                       | [3.0965...3.0113] |                                 |

|             |                 |                   |                                |             |                   |                   |                                |
|-------------|-----------------|-------------------|--------------------------------|-------------|-------------------|-------------------|--------------------------------|
| HMDB0000158 | L-Tyrosine      | [3.0827...3.0747] |                                | HMDB0000182 | L-Lysine          | [3.0112...2.9715] |                                |
| HMDB0000158 | L-Tyrosine      | [3.0716...3.0639] | overlapped with<br>HMDB0000192 |             |                   | [2.9714...2.9193] |                                |
| HMDB0000192 | L-Cystine       | [3.0611...3.054]  |                                |             |                   | [2.886...2.864]   |                                |
| HMDB0000158 | L-Tyrosine      | [3.0553...3.0534] | overlapped with<br>HMDB0000192 |             |                   | [2.8625...2.8477] |                                |
| HMDB0000192 | L-Cystine       | [3.0528...3.0497] |                                |             |                   | [2.8466...2.8206] |                                |
| HMDB0000562 | Creatinine      | [3.0491...3.043]  | overlapped with<br>HMDB0000158 |             |                   | [2.811...2.7965]  |                                |
| HMDB0000182 | L-Lysine        | [3.0429...3.0371] |                                |             |                   | [2.7964...2.764]  |                                |
| HMDB0001511 | Phosphocreatine | [3.037...3.0302]  |                                |             |                   | [2.7626...2.754]  |                                |
| HMDB0000562 | Creatinine      | [3.0284...3.0188] | overlapped with<br>HMDB0000182 | HMDB0000087 | Dimethylamine     | [2.7379...2.7298] |                                |
| HMDB0000182 | L-Lysine        | [3.0176...3.0091] |                                | HMDB0000094 | Citric acid       | [2.7297...2.6938] |                                |
|             |                 | [3.0088...2.9808] |                                | HMDB0000696 | L-Methionine      | [2.6937...2.6683] | overlapped with<br>HMDB0000164 |
| HMDB0000125 | Glutathione     | [2.9676...2.9557] |                                | HMDB0000164 | Methylamine       | [2.6681...2.6332] | overlapped with<br>HMDB0000696 |
| HMDB0000125 | Glutathione     | [2.9548...2.9403] |                                | HMDB0000696 | L-Methionine      | [2.6326...2.5984] | overlapped with<br>HMDB0000164 |
| HMDB0000125 | Glutathione     | [2.9389...2.9308] |                                | HMDB0000267 | Pyroglutamic acid | [2.5983...2.5349] |                                |
| HMDB0000125 | Glutathione     | [2.9122...2.889]  |                                | HMDB0000641 | L-Glutamine       | [2.5348...2.4347] |                                |
|             |                 | [2.8827...2.8629] |                                | HMDB0000254 | Succinic acid     | [2.4229...2.4138] |                                |
| HMDB0001522 | Methylguanidine | [2.8614...2.8535] |                                | HMDB0000243 | Pyruvic acid      | [2.4094...2.3989] |                                |
| HMDB0000191 | L-Aspartic acid | [2.8532...2.8311] |                                | HMDB0000883 | L-Valine          | [2.3983...2.3873] |                                |
| HMDB0000191 | L-Aspartic acid | [2.8233...2.8087] |                                | HMDB0000883 | L-Valine          | [2.3835...2.3244] |                                |

|             |                       |                   |                                |             |                       |                   |                                |
|-------------|-----------------------|-------------------|--------------------------------|-------------|-----------------------|-------------------|--------------------------------|
|             |                       | [2.8001...2.7874] |                                |             |                       | [2.3236...2.3098] |                                |
| HMDB0000087 | Dimethylamine         | [2.7612...2.7515] |                                | HMDB0001659 | Acetone               | [2.3097...2.2432] | overlapped with<br>HMDB0000883 |
| HMDB0000191 | L-Aspartic acid       | [2.7269...2.7052] |                                |             |                       | [2.2431...2.2295] |                                |
| HMDB0000094 | Citric acid           | [2.6977...2.6916] |                                | HMDB0000696 | L-Methionine          | [2.211...2.1553]  | overlapped with<br>HMDB0000148 |
| HMDB0000742 | Homocysteine          | [2.6855...2.6725] |                                | HMDB0000148 | L-Glutamic acid       | [2.1538...2.1018] | overlapped with<br>HMDB0000190 |
| HMDB0000094 | Citric acid           | [2.6723...2.6565] |                                |             |                       | [2.033...2.011]   |                                |
| HMDB0000742 | Homocysteine          | [2.6563...2.6247] | overlapped with<br>HMDB0000696 |             |                       | [2.012...2.00]    |                                |
| HMDB0000267 | Pyroglutamic acid     | [2.5528...2.543]  |                                |             |                       | [1.9828...1.966]  |                                |
| HMDB0001149 | 5-Aminolevulinic acid | [2.5374...2.5266] |                                | HMDB0000042 | Acetic acid           | [1.9279...1.9021] |                                |
| HMDB0000267 | Pyroglutamic acid     | [2.5263...2.4803] | HMDB0001149                    |             |                       | [1.8325...1.8198] |                                |
| HMDB0000641 | L-Glutamine           | [2.48...2.4698]   | overlapped with<br>HMDB0000267 |             |                       | [1.7998...1.788]  |                                |
| HMDB0000641 | L-Glutamine           | [2.4682...2.4235] |                                | HMDB0000008 | 2-Hydroxybutyric acid | [1.7639...1.6155] | overlapped with<br>HMDB0000557 |
| HMDB0000267 | Pyroglutamic acid     | [2.4225...2.3857] |                                |             |                       | [1.6144...1.5691] |                                |
| HMDB0000243 | Pyruvic acid          | [2.3832...2.3673] |                                |             |                       | [1.569...1.5032]  |                                |
| HMDB0000148 | L-Glutamic acid       | [2.3658...2.2961] | overlapped with<br>HMDB0000162 | HMDB0000161 | L-Alanine             | [1.5013...1.4705] |                                |
| HMDB0000883 | L-Valine              | [2.2956...2.237]  |                                | HMDB0000182 | L-Lysine              | [1.4682...1.3544] |                                |
| HMDB0000641 | L-Glutamine           | [2.1942...2.0898] | overlapped with<br>HMDB0000148 | HMDB0000167 | L-Threonine           | [1.3432...1.3134] | overlapped with<br>HMDB0000190 |

|             |                 |                   |                                                |             |                          |                   |                                                                |
|-------------|-----------------|-------------------|------------------------------------------------|-------------|--------------------------|-------------------|----------------------------------------------------------------|
| HMDB0000148 | L-Glutamic acid | [2.0873...2.0045] | overlapped with<br>HMDB0000267,<br>HMDB0000162 | HMDB0000172 | L-Isoleucine             | [1.3133...1.2602] |                                                                |
| HMDB0000162 | L-Proline       | [1.9982...1.9515] |                                                | HMDB0000754 | 3-Hydroxyisovaleric acid | [1.2594...1.2415] |                                                                |
| HMDB0000517 | L-Arginine      | [1.947...1.9214]  | overlapped with<br>HMDB0000182<br>HMDB0000650  |             |                          | [1.2366...1.2051] |                                                                |
| HMDB0000042 | Acetic acid     | [1.9212...1.9157] |                                                | HMDB0000108 | Ethanol                  | [1.1994...1.1962] |                                                                |
| HMDB0000517 | L-Arginine      | [1.9152...1.855]  | overlapped with<br>HMDB0000182                 |             |                          | [1.1925...1.1916] |                                                                |
| HMDB0000517 | L-Arginine      | [1.7894...1.6407] | overlapped with<br>HMDB0000182                 | HMDB0000108 | Ethanol                  | [1.1916...1.175]  |                                                                |
|             |                 | [1.6397...1.6308] |                                                |             |                          | [1.184...1.1699]  |                                                                |
|             |                 | [1.5534...1.52]   |                                                |             |                          | [1.1547...1.1375] |                                                                |
| HMDB0000182 | L-Lysine        | [1.5195...1.4917] |                                                |             |                          | [1.1147...1.0788] |                                                                |
| HMDB0000161 | L-Alanine       | [1.4913...1.4584] |                                                |             |                          | [1.075...1.0647]  |                                                                |
| HMDB0000172 | L-Isoleucine    | [1.458...1.4078]  | overlapped with<br>HMDB0000182                 | HMDB0000883 | L-Valine                 | [1.0576...1.0313] |                                                                |
|             |                 | [1.3734...1.3656] |                                                | HMDB0000172 | L-Isoleucine             | [1.0238...1.0052] |                                                                |
| HMDB0000167 | L-Threonine     | [1.3441...1.3273] |                                                | HMDB0000883 | L-Valine                 | [1.005...0.9848]  |                                                                |
| HMDB0000190 | L-Lactic acid   | [1.3272...1.3205] |                                                | HMDB0000557 | L-Alloisoleucine         | [0.9829...0.9718] | overlapped with<br>HMDB0000687                                 |
| HMDB0000167 | L-Threonine     | [1.3204...1.3151] |                                                | HMDB0000557 | L-Alloisoleucine         | [0.9704...0.9503] | overlapped with<br>HMDB0000172,<br>HMDB0000650,<br>HMDB0000008 |

|             |                           |                   |                                           |             |                           |                   |                                                                |
|-------------|---------------------------|-------------------|-------------------------------------------|-------------|---------------------------|-------------------|----------------------------------------------------------------|
| HMDB0000190 | L-Lactic acid             | [1.315...1.3055]  |                                           | HMDB0000650 | D-Alpha-aminobutyric acid | [0.95...0.9393]   | overlapped with<br>HMDB0000172,<br>HMDB0000695,<br>HMDB0000008 |
| HMDB0000172 | L-Isoleucine              | [1.2812...1.2247] |                                           | HMDB0000695 | Ketoleucine               | [0.9382...0.9267] | overlapped with<br>HMDB0000172,<br>HMDB0000008                 |
| HMDB0000108 | Ethanol                   | [1.1929...1.1414] |                                           | HMDB0000422 | 2-Methylglutaric acid     | [0.925...0.9112]  | overlapped with<br>HMDB0000008                                 |
|             |                           | [1.1246...1.1079] |                                           |             |                           | [0.9108...0.8831] |                                                                |
|             |                           | [1.1015...1.0549] |                                           |             |                           | [0.8816...0.8429] |                                                                |
| HMDB0000883 | L-Valine                  | [1.0444...1.0274] |                                           |             |                           | [0.7848...0.7717] |                                                                |
| HMDB0000172 | L-Isoleucine              | [1.0117...0.9888] |                                           |             |                           | [0.7477...0.7279] |                                                                |
| HMDB0000883 | L-Valine                  | [0.9851...0.978]  |                                           |             |                           |                   |                                                                |
| HMDB0000687 | L-Leucine                 | [0.9696...0.9508] |                                           |             |                           |                   |                                                                |
| HMDB0000172 | L-Isoleucine              | [0.95...0.9403]   | overlapped with<br>unknown                |             |                           |                   |                                                                |
| HMDB0000172 | L-Isoleucine              | [0.9381...0.9295] | overlapped with<br>HMDB0000650<br>unknown |             |                           |                   |                                                                |
| HMDB0000650 | D-Alpha-aminobutyric acid | [0.9273...0.9196] | overlapped with<br>HMDB0000172            |             |                           |                   |                                                                |
| HMDB0000650 | D-Alpha-aminobutyric acid | [0.9116...0.9056] |                                           |             |                           |                   |                                                                |
|             |                           | [0.8903...0.8804] |                                           |             |                           |                   |                                                                |
|             |                           | [0.1646...0.1547] |                                           |             |                           |                   |                                                                |

**Supplemental Table S3. Variable Importance in Projection scores (VIPs) resulting from the comparison of S1DD and S1SD media samples with respect to the IPSC groups from PLS-DA models for individual (2 group comparisons). VIP scores >1 are presented alongside metabolite annotations and ANOVA univariate testing results. Significance level determined at \* <0.05, \*\* <0.01, \*\*\* <0.001.**

| S1DD                  |           | S1SD                  |           |
|-----------------------|-----------|-----------------------|-----------|
| Metabolite Annotation | VIP Score | Metabolite Annotation | VIP Score |
| Formate***            | 1.218473  | Arginine***           | 1.11094   |
| Glutathione           | 1.213458  | Lactate***            | 1.110872  |
| Threonine***          | 1.212801  | Lysine***             | 1.109737  |
| Phenylalanine***      | 1.211109  | Glutamine***          | 1.109512  |
| Pyruvate***           | 1.210975  | Proline***            | 1.108974  |
| Glycine***            | 1.209096  | Creatine***           | 1.10893   |
| Aspartate**           | 1.206322  | Phosphocreatine***    | 1.108904  |
| Glutamine***          | 1.205866  | Valine***             | 1.107641  |
| Glucose*              | 1.203588  | Glutamate***          | 1.107198  |
| Histidine***          | 1.202707  | Threonine***          | 1.106748  |
| Glutamate***          | 1.20054   | Glucose**             | 1.104057  |
| Cysteine***           | 1.195824  | Isoleucine***         | 1.103927  |
| Pyroglutamate***      | 1.188956  | Formate***            | 1.103476  |
| Alanine***            | 1.188393  | Glycine***            | 1.102678  |
| Acetate***            | 1.184197  | 2 Aminobutyrate***    | 1.101023  |
| Methionine***         | 1.167963  | Leucine***            | 1.10001   |
| Creatine***           | 1.155498  | Acetate***            | 1.098555  |
| Proline***            | 1.152625  | Phenylalanine***      | 1.096797  |
| Lactate***            | 1.14968   | Myo inositol***       | 1.0961    |
| Fructose***           | 1.14696   | Cysteine***           | 1.092953  |
| Threonate***          | 1.141046  | Tyrosine***           | 1.09241   |
| Choline***            | 1.050961  | Methanol              | 1.09195   |
| Homocysteine**        | 1.021726  | Pyruvate***           | 1.090073  |
| Acetylcholine***      | 1.004577  | Histidine***          | 1.083661  |
|                       |           | Homocysteine***       | 1.075609  |
|                       |           | Choline***            | 1.073675  |
|                       |           | Alanine***            | 1.054214  |
|                       |           | Fructose***           | 1.050927  |
|                       |           | Acetylcholine***      | 1.046391  |
|                       |           | Pyroglutamate***      | 1.032033  |
|                       |           | Methionine***         | 1.008401  |
|                       |           | Serine***             | 1.007691  |
|                       |           | Glutathione***        | 1.004739  |

**Supplemental Table S4. MSEA for S1DD vs iPSCs Extracellular Metabolites.** Significantly enriched pathways ( $p < 0.05$ ) are presented with their component metabolite annotations. ANOVA significant metabolites vs their respective cell-free controls are coloured blue (decreased vs iPSCs), red (increased vs iPSCs) or black (non-significant in ANOVA).

| Metabolic Pathway      | Metabolite Annotations                                         | P value  | FDR      |
|------------------------|----------------------------------------------------------------|----------|----------|
| Glycine and Serine     | Creatine, Glycine, Glutamate, Alanine, Threonine, Pyruvate,    | 2.52E-06 | 1.80E-04 |
| Glutathione Metabolism | Glycine, Glutathione, Glutamate, Alanine, Pyroglutamate,       | 3.68E-06 | 1.80E-04 |
| Glutamate Metabolism   | Glycine, Glutathione, Glutamate, Alanine, Aspartate, Pyruvate, | 6.33E-06 | 2.07E-04 |
| Ammonia Recycling      | Glycine, Glutamate, Histidine, Aspartate, Pyruvate, Glutamine  | 5.18E-05 | 0.00127  |
| Glucose-Alanine Cycle  | Glucose, Glutamate, Alanine, Pyruvate                          | 1.45E-04 | 0.00284  |
| Urea Cycle             | Glutamate, Alanine, Aspartate, Pyruvate, Glutamine             | 3.72E-04 | 0.00608  |
| Alanine Metabolism     | Glycine, Glutamate, Alanine, Pyruvate                          | 4.52E-04 | 0.00633  |
| Amino Sugar            | Acetate, Glutamate, Pyruvate, Glutamine, Fructose              | 6.99E-04 | 0.00856  |
| Methionine Metabolism  | Choline, Glycine, Cysteine, Methionine, Homocysteine           | 0.00242  | 0.0263   |
| Arginine and Proline   | Creatine, Glycine, Glutamate, Proline, Aspartate               | 0.00615  | 0.0603   |
| Aspartate Metabolism   | Acetate, Glutamate, Aspartate, Glutamine                       | 0.00748  | 0.0666   |
| Warburg Effect         | Glucose, Glutamate, Lactate, Pyruvate, Glutamine               | 0.00907  | 0.0741   |
| Betaine Metabolism     | Choline, Methionine, Homocysteine                              | 0.0114   | 0.086    |
| Homocysteine           | Cysteine, Homocysteine                                         | 0.0172   | 0.12     |
| Cysteine Metabolism    | Glutamate, Pyruvate, Cysteine                                  | 0.0207   | 0.122    |
| Malate-Aspartate       | Glutamate, Aspartate                                           | 0.0211   | 0.122    |
| Pyruvaldehyde          | Glutathione, Pyruvate                                          | 0.0211   | 0.122    |
| Pyruvate Metabolism    | Acetate, Glutathione, Lactate, Pyruvate                        | 0.0226   | 0.123    |
| Beta-Alanine           | Glutamate, Histidine, Aspartate                                | 0.042    | 0.217    |
| Gluconeogenesis        | Glucose, Lactate, Pyruvate                                     | 0.0453   | 0.222    |

**Supplemental Table S5. One-way ANOVA with Tukeys post hoc analysis and Variable Importance in Projection scores (VIPs) Resulting from the Four-Group Comparison of DD Samples with Respect to the IPSC groups from PLS-DA Models for Intracellular and Media Datasets.** VIP scores >1 are presented alongside metabolite annotations.

| Intracellular Dataset |                    |                  |    | Media Dataset         |        |           |        |        |        |
|-----------------------|--------------------|------------------|----|-----------------------|--------|-----------|--------|--------|--------|
| Metabolite Annotation |                    | VIP Score        |    | Metabolite Annotation |        | VIP Score |        |        |        |
| Sucrose               |                    | 1.723663         |    | Proline               |        | 2.038509  |        |        |        |
| 2-Methylglutarate     |                    | 1.688617         |    | Methanol              |        | 1.697869  |        |        |        |
| Glucose-6-phosphate   |                    | 1.595152         |    | Threonate             |        | 1.647413  |        |        |        |
| Acetylcholine         |                    | 1.483247         |    | Aspartate             |        | 1.632209  |        |        |        |
| Oxypurinol            |                    | 1.481848         |    | Acetylcholine         |        | 1.628173  |        |        |        |
| Glycine               |                    | 1.435978         |    | Dimethylxanthine      |        | 1.620004  |        |        |        |
| Ketoleucine           |                    | 1.433853         |    | Choline               |        | 1.575335  |        |        |        |
| Tyrosine              |                    | 1.430902         |    | Homocysteine          |        | 1.545205  |        |        |        |
| Adenosine             |                    | 1.42446          |    | Acetate               |        | 1.46985   |        |        |        |
| Deoxyadenosine        |                    | 1.378853         |    | Formate               |        | 1.359794  |        |        |        |
| phenylalanine         |                    | 1.28141          |    | 2 Aminobutyrate       |        | 1.198795  |        |        |        |
| Homocysteine          |                    | 1.257761         |    | Glutathione           |        | 1.061053  |        |        |        |
| Lysine                |                    | 1.236632         |    | Dimethylurate         |        | 1.060311  |        |        |        |
| 2-Aminobutyrate       |                    | 1.202638         |    | Leucine               |        | 1.02976   |        |        |        |
| Creatine phosphate    |                    | 1.192762         |    |                       |        |           |        |        |        |
| 2-Hydroxybutyrate     |                    | 1.179124         |    |                       |        |           |        |        |        |
| Pyroglutamate         |                    | 1.139851         |    |                       |        |           |        |        |        |
| Histidine             |                    | 1.12535          |    |                       |        |           |        |        |        |
| Xanthine              |                    | 1.109243         |    |                       |        |           |        |        |        |
| Inosinic acid         |                    | 1.08561          |    |                       |        |           |        |        |        |
| Pyruvate              |                    | 1.065754         |    |                       |        |           |        |        |        |
| Methionine            |                    | 1.065006         |    |                       |        |           |        |        |        |
| actate                |                    | 1.000463         |    |                       |        |           |        |        |        |
| Metabolite Annotation | Metabolite HMDB ID | one-way adjusted | p- | S1-                   | S2-    | S3-       | S2-S1  | S3-S1  | S3-S2  |
| 2-Aminobutyrate       | HMDB0000650        | 0.0001           |    | 0.9862                | 0.0001 | 0.9955    | 0.0001 | 0.9995 | 0.0001 |
| 2-                    | HMDB0000008        | 0.0000           |    | 1.0000                | 0.0000 | 0.9976    | 0.0000 | 0.9987 | 0.0000 |
| 2-Methylglutarate     | HMDB0000422        | 0.0005           |    | 0.1648                | 0.0015 | 0.9239    | 0.0966 | 0.0394 | 0.0003 |
| Acetate               | HMDB0000042        | 0.0000           |    | 0.0037                | 0.0000 | 0.6532    | 0.0000 | 0.0002 | 0.0000 |
| Acetone               | HMDB0001659        | 0.0000           |    | 0.8039                | 0.0000 | 0.0267    | 0.0000 | 0.1254 | 0.0015 |
| Acetylcholine         | HMDB0000895        | 0.0000           |    | 0.0137                | 0.0000 | 0.0000    | 0.0000 | 0.0000 | 0.0016 |
| Adenosine             | HMDB0000050        | 0.0061           |    | 0.5331                | 0.0175 | 0.0050    | 0.1853 | 0.0671 | 0.9717 |
| Alanine               | HMDB0000161        | 0.0000           |    | 0.2036                | 0.0000 | 0.5807    | 0.0000 | 0.0121 | 0.0000 |
| Citrate               | HMDB0000094        | 0.0034           |    | 0.9627                | 0.0104 | 0.1450    | 0.0026 | 0.0455 | 0.4670 |
| Creatine              | HMDB0001511        | 0.0010           |    | 0.0009                | 0.0399 | 0.0007    | 0.3874 | 0.9984 | 0.3114 |
| Deoxyadenosine        | HMDB0000101        | 0.0093           |    | 0.4143                | 0.0353 | 0.0053    | 0.4282 | 0.1068 | 0.8697 |
| Ethanol               | HMDB0000108        | 0.0000           |    | 0.0100                | 0.0000 | 0.7591    | 0.0000 | 0.0007 | 0.0000 |
| Formate               | HMDB0000142        | 0.0000           |    | 0.0142                | 0.0000 | 0.5999    | 0.0000 | 0.0006 | 0.0000 |
| Glucose               | HMDB0000122        | 0.0196           |    | 0.0092                | 0.6777 | 0.5008    | 0.1001 | 0.1289 | 0.9945 |
| Glucose-6-            | HMDB0001401        | 0.0000           |    | 0.0001                | 0.0000 | 0.0020    | 0.0011 | 0.5757 | 0.0001 |
| Glutamate             | HMDB0000148        | 0.0003           |    | 0.9287                | 0.0006 | 0.0028    | 0.0015 | 0.0070 | 0.8095 |
| Glutamine             | HMDB0000641        | 0.0136           |    | 0.7528                | 0.0576 | 0.9868    | 0.0056 | 0.5177 | 0.0865 |
| Homocvsteine          | HMDB0000676        | 0.0003           |    | 0.0001                | 0.0103 | 0.0009    | 0.1850 | 0.6286 | 0.7709 |

|                   |             |        |        |        |        |        |        |        |
|-------------------|-------------|--------|--------|--------|--------|--------|--------|--------|
| Hydroxyvalerate   | HMDB0000754 | 0.0000 | 0.0237 | 0.0000 | 0.8916 | 0.0000 | 0.0035 | 0.0000 |
| Indoleacetic acid | HMDB0000197 | 0.0098 | 0.7915 | 0.0048 | 0.4683 | 0.0237 | 0.9360 | 0.0723 |
| Inosinic acid     | HMDB0000175 | 0.0001 | 0.0080 | 0.0001 | 0.0000 | 0.1654 | 0.0560 | 0.9677 |
| Isoleucine        | HMDB0000172 | 0.0000 | 0.0002 | 0.0018 | 0.9897 | 0.0000 | 0.0002 | 0.0006 |
| Ketoleucine       | HMDB0000695 | 0.0001 | 0.8680 | 0.0002 | 0.8982 | 0.0006 | 0.4399 | 0.0000 |
| Lactate           | HMDB0000190 | 0.0000 | 0.6432 | 0.0001 | 0.0001 | 0.0008 | 0.0004 | 0.9995 |
| Leucine           | HMDB0000557 | 0.0000 | 0.0692 | 0.0012 | 0.5750 | 0.0000 | 0.4995 | 0.0001 |
| Lysine            | HMDB0000182 | 0.0012 | 0.9789 | 0.0030 | 0.9408 | 0.0046 | 0.7485 | 0.0006 |
| Malonate          | HMDB0000691 | 0.0001 | 0.8665 | 0.0001 | 0.0183 | 0.0003 | 0.0678 | 0.0605 |
| Methionine        | HMDB0000696 | 0.0001 | 0.0022 | 0.7564 | 0.0034 | 0.0002 | 0.9960 | 0.0004 |
| Methylamine       | HMDB0000164 | 0.0000 | 0.9290 | 0.0000 | 0.0346 | 0.0000 | 0.0067 | 0.0008 |
| Oxypurinol        | HMDB0000786 | 0.0003 | 0.0044 | 0.0217 | 0.0000 | 0.9307 | 0.1481 | 0.0589 |
| Phenylacetate     | HMDB0000209 | 0.0039 | 0.9387 | 0.0040 | 0.9971 | 0.0093 | 0.9787 | 0.0042 |
| phenylalanine     | HMDB0000159 | 0.0241 | 0.7825 | 0.9437 | 0.0541 | 0.4448 | 0.2496 | 0.0165 |
| Pyroglutamate     | HMDB0000267 | 0.0065 | 0.7031 | 0.0034 | 0.0853 | 0.0230 | 0.4369 | 0.3326 |
| Pyruvate          | HMDB0000243 | 0.0002 | 0.0006 | 0.8761 | 0.6530 | 0.0001 | 0.0050 | 0.2428 |
| Succinate         | HMDB0000254 | 0.0025 | 0.9342 | 0.0056 | 0.5134 | 0.0011 | 0.1942 | 0.0719 |
| Sucrose           | HMDB0000258 | 0.0000 | 0.0000 | 0.0000 | 0.0000 | 0.0001 | 0.0165 | 0.1200 |
| Taurine           | HMDB0000251 | 0.0000 | 0.0002 | 0.6773 | 0.0501 | 0.0000 | 0.0630 | 0.0042 |
| Threonine         | HMDB0000167 | 0.0000 | 0.0000 | 0.0000 | 0.7075 | 0.0000 | 0.0000 | 0.0000 |
| Tyrosine          | HMDB0000158 | 0.0065 | 0.4257 | 0.9605 | 0.0044 | 0.7246 | 0.0855 | 0.0130 |
| Valine            | HMDB0000883 | 0.0000 | 0.0009 | 0.0086 | 0.1311 | 0.0000 | 0.0928 | 0.0000 |

**Supplemental Table S6. Variable Importance in Projection Scores (VIPs) Resulting from the Individual Comparison of DD groups with Respect to the IPSC Group from PLS-DA Models for the Intracellular Dataset.** VIP scores >1 are presented alongside metabolite annotations and ANOVA univariate testing results. Significance level determined at \* <0.05, \*\* <0.01, \*\*\* <0.001.

| S1DD                   |           | S2DD                   |           | S3DD                   |           |
|------------------------|-----------|------------------------|-----------|------------------------|-----------|
| Metabolite Annotation  | VIP Score | Metabolite Annotation  | VIP Score | Metabolite Annotation  | VIP Score |
| Sucrose***             | 1.397569  | Acetylcholine***       | 1.555442  | Acetylcholine***       | 1.447401  |
| Ethanol***             | 1.374083  | Sucrose***             | 1.529416  | Sucrose***             | 1.440233  |
| Acetate***             | 1.370907  | Acetate***             | 1.504001  | Creatine phosphate***  | 1.434273  |
| Hydroxyvalerate***     | 1.369574  | Ethanol***             | 1.498789  | Homocysteine***        | 1.422569  |
| Threonine***           | 1.337701  | Alanine***             | 1.48808   | Lactate**              | 1.410889  |
| Formate***             | 1.312402  | Hydroxyvalerate***     | 1.484452  | Glucose-6-phosphate*** | 1.404792  |
| NADP                   | 1.278712  | Glucose-6-phosphate*** | 1.477592  | Oxypurinol***          | 1.402631  |
| Deoxyadenosine         | 1.275282  | Formate***             | 1.47615   | Inosinic acid***       | 1.354926  |
| Glucose*               | 1.266142  | 2-Hydroxybutyrate***   | 1.437496  | Tyrosine**             | 1.341862  |
| Methionine**           | 1.263685  | Ketoleucine***         | 1.381863  | Deoxyadenosine***      | 1.313858  |
| Pyruvate***            | 1.241863  | 2-Aminobutyrate***     | 1.368456  | Phenylalanine*         | 1.279026  |
| Inosine                | 1.220542  | Glutamate**            | 1.315134  | Adenosine***           | 1.271228  |
| Histamine              | 1.207087  | Leucine/Alloleucine*** | 1.314008  | Methionine*            | 1.244384  |
| Glucose-6-phosphate*** | 1.197916  | Glycine                | 1.288738  | Valine*                | 1.238327  |
| Tyrosine               | 1.186371  | Threonine***           | 1.288182  | Glucose                | 1.215356  |
| Glycine                | 1.181074  | 2-Methylglutarate***   | 1.27448   | Leucine/Alloleucine    | 1.2066    |
| Creatine phosphate**   | 1.171552  | Acetone***             | 1.259537  | Lysine                 | 1.205522  |
| Taurine***             | 1.163449  | Inosinic acid**        | 1.259403  | Glycine**              | 1.196942  |
| Isoleucine**           | 1.141893  | Valine**               | 1.247991  | Taurine                | 1.155978  |
| Methylhistidine        | 1.126169  | Indoleacetic acid*     | 1.239633  | Indoleacetic acid      | 1.144108  |
| Homocysteine***        | 1.105397  | Pyroglutamate**        | 1.198366  | Ethanol                | 1.103882  |
| Adenosine              | 1.10239   | Lactate***             | 1.18872   | 2-Methylglutarate      | 1.098045  |
| Valine**               | 1.019288  | Isoleucine**           | 1.180112  | Malonate               | 1.084838  |
|                        |           | Lysine**               | 1.13992   | Ketoleucine            | 1.078614  |
|                        |           | Adenosine*             | 1.105339  | Isoleucine             | 1.075809  |
|                        |           | Methylamine**          | 1.094791  | Acetate*               | 1.050083  |
|                        |           | Oxypurinol*            | 1.061572  | Xanthine               | 1.033155  |
|                        |           | Succinate**            | 1.00394   | Creatinine             | 1.030859  |
|                        |           |                        |           | Methylamine            | 1.017562  |
|                        |           |                        |           | Histidine              | 1.005582  |

**Supplemental Table S7. Variable Importance in Projection scores (VIPs) resulting from the Individual comparison of DD groups with respect to the IPSC group from PLS-DA models for the extracellular dataset.** VIP scores >1 are presented alongside metabolite annotations and ANOVA univariate testing results. Significance level determined at \* <0.05, \*\* <0.01, \*\*\* <0.001.

| S1DD                  |           | S2DD                  |           | S3DD                  |           |
|-----------------------|-----------|-----------------------|-----------|-----------------------|-----------|
| Metabolite Annotation | VIP Score | Metabolite Annotation | VIP Score | Metabolite Annotation | VIP Score |
| Formate***            | 1.218473  | Acetate***            | 1.224132  | Glutamate             | 1.2519    |
| Glutathione           | 1.213458  | Glutamate             | 1.223248  | Acetate***            | 1.24847   |
| Threonine***          | 1.212801  | Creatine***           | 1.208352  | Arginine***           | 1.244228  |
| Phenylalanine***      | 1.211109  | Arginine***           | 1.207134  | Methanol***           | 1.232998  |
| Pyruvate***           | 1.210975  | Lactate***            | 1.206539  | Lysine***             | 1.232743  |
| Glycine***            | 1.209096  | Choline***            | 1.206514  | Phosphocreatine***    | 1.229675  |
| Aspartate**           | 1.206322  | Proline***            | 1.205668  | Lactate***            | 1.229533  |
| Glutamine***          | 1.205866  | Phosphocreatine***    | 1.196213  | Dimethylxanthine***   | 1.228595  |
| Glucose*              | 1.203588  | Glutamine***          | 1.194759  | Creatine***           | 1.228266  |
| Histidine***          | 1.202707  | Dimethylxanthine***   | 1.186757  | Proline***            | 1.228245  |
| Glutamate             | 1.20054   | Glucose               | 1.185753  | Formate***            | 1.22189   |
| Cysteine***           | 1.195824  | Lysine***             | 1.184011  | Myo inositol***       | 1.216357  |
| Pyroglutamate***      | 1.188956  | Pyruvate***           | 1.168333  | Aspartate*            | 1.205373  |
| Alanine***            | 1.188393  | Acetylcholine***      | 1.153279  | Choline               | 1.167564  |
| Acetate***            | 1.184197  | Valine***             | 1.152778  | Glutamine***          | 1.165974  |
| Methionine***         | 1.167963  | 2 Aminobutyrate***    | 1.144056  | Pyroglutamate***      | 1.15753   |
| Creatine***           | 1.155498  | Methanol***           | 1.131734  | Acetylcholine**       | 1.150874  |
| Proline***            | 1.152625  | Cysteine***           | 1.123402  | Glycine***            | 1.145208  |
| Lactate***            | 1.14968   | Glycine***            | 1.121403  | Alanine***            | 1.10391   |
| Fructose***           | 1.14696   | Tyrosine***           | 1.116766  | Tyrosine***           | 1.075261  |
| Threonate***          | 1.141046  | Phenylalanine***      | 1.09953   | Valine***             | 1.058319  |
| Choline***            | 1.050961  | Threonine***          | 1.087133  | Homocysteine***       | 1.034532  |
| Homocysteine**        | 1.021726  | Pyroglutamate***      | 1.085185  | Dimethylurate***      | 1.033392  |
| Acetylcholine***      | 1.004577  | Myo inositol***       | 1.082971  | 2 Aminobutyrate***    | 1.031598  |
|                       |           | Alanine**             | 1.079592  | Cysteine**            | 1.013555  |
|                       |           | Leucine***            | 1.046988  |                       |           |
|                       |           | Isoleucine***         | 1.028348  |                       |           |
|                       |           | Ethanol**             | 1.028303  |                       |           |
|                       |           | Dimethylurate***      | 1.018658  |                       |           |
|                       |           | Threonate             | 1.01672   |                       |           |
|                       |           | Homocysteine          | 1.003369  |                       |           |

**Supplemental Table S8. Protocol for the directed differentiation (DD) of iPSCs to chondrogenic cells.** iPSCs were cultured on a fibronectin matrix with DD initiated on day 1 at 90% confluence. Cells were cultured in a basal medium (DMEM:F12, 2mM L-glutamine, 1% (vol/vol) ITS, 1% (vol/vol) nonessential amino acids, 2% (vol/vol) B27, 90µM β-mercaptoethanol) temporally supplemented with growth factor combinations as shown. Differentiating cultures were expanded by passage with TrypLE™ Express at described ratios. Fibronectin = 50µg/ml; Gelatin = 0.1% (vol/vol); Fibronectin: Gelatin substrate was mixed at a ratio of 1:1. FGF2 = fibroblast growth factor-2; BMP4 = bone morphogenetic protein-4; NT4, neurotrophin-4.

[illegible]

**Supplemental Table S9. Scaling factor analysis of whole spectral and methyl data for cell extract samples following normalization by total area.** The table demonstrates the differences in scaling factors when applied to each sample in the dataset. Scaling factors were maintained between whole dataset and methyl data, permitting further statistical comparisons.

| All Bins |               |                | Methyl Bins |               |                | Ratio of factors |
|----------|---------------|----------------|-------------|---------------|----------------|------------------|
| Group    | Sample Number | Scaling Factor | Group       | Sample Number | Scaling Factor |                  |
| IPSC     | 1             | 1.372523       | IPSC        | 1             | 1.421162       | 0.965775         |
|          | 2             | 0.93709        |             | 2             | 0.995438       | 0.941385         |
|          | 3             | 0.964305       |             | 3             | 0.985384       | 0.978609         |
|          | 4             | 1.001396       |             | 4             | 1.079942       | 0.927268         |
|          | 5             | 0.930143       |             | 5             | 1.023003       | 0.909228         |
| DD D4    | 1             | 3.844464       | DD D4       | 1             | 3.442081       | 1.116901         |
|          | 2             | 3.005385       |             | 2             | 2.752361       | 1.09193          |
|          | 3             | 3.628163       |             | 3             | 3.309954       | 1.096137         |
|          | 4             | 2.915928       |             | 4             | 2.780686       | 1.048637         |
|          | 5             | 1.151501       |             | 5             | 1.098874       | 1.047891         |
|          | 6             | 2.969386       |             | 6             | 2.640906       | 1.124382         |
| DD D11   | 1             | 0.351924       | DD D11      | 1             | 0.40446        | 0.870108         |
|          | 2             | 0.54798        |             | 2             | 0.494136       | 1.108966         |
|          | 3             | 0.334604       |             | 3             | 0.392652       | 0.852165         |
|          | 4             | 0.443504       |             | 4             | 0.434527       | 1.020661         |
|          | 5             | 0.430913       |             | 5             | 0.433873       | 0.993176         |
| DD D17   | 1             | 0.85096        | DD D17      | 1             | 0.822874       | 1.034131         |
|          | 2             | 0.831951       |             | 2             | 0.757282       | 1.0986           |
|          | 3             | 0.818384       |             | 3             | 0.816293       | 1.002562         |
|          | 4             | 0.82108        |             | 4             | 0.792287       | 1.036343         |
|          | 5             | 0.624956       |             | 5             | 0.62982        | 0.992277         |
|          | 6             | 0.878158       |             | 6             | 0.811288       | 1.082424         |
| EB D4    | 1             | 0.142086       | EB D4       | 1             | 0.282962       | 0.502139         |
|          | 2             | 0.16573        |             | 2             | 0.31541        | 0.525442         |
|          | 3             | 0.178749       |             | 3             | 0.353217       | 0.506061         |
|          | 4             | 0.160837       |             | 4             | 0.295878       | 0.543593         |
|          | 5             | 0.131821       |             | 5             | 0.270455       | 0.487406         |
|          | 6             | 0.201494       |             | 6             | 0.316388       | 0.636856         |
| EB D17   | 1             | 0.141895       | EB D17      | 1             | 0.288409       | 0.491993         |
|          | 2             | 0.134606       |             | 2             | 0.289319       | 0.465252         |
|          | 3             | 0.088082       |             | 3             | 0.268679       | 0.327834         |

**Supplemental Table S10. Summary Statistics for all PLS-DA Models Employed.** 10-fold CV performed per PLS-DA to calculate accuracy, R2, Q2, and train:test splits employed to determine AUROC as per Szymanska et al 2012 [78] and 2000 permutations of each PLS-DA performed via metaboanalyst (Xia et al 2009 [79]).

|                                  | Accuracy | R2      | Q2      | CV-ANOVA | ROC                             | Permutation Results<br>p-value (permutations) | Number of<br>Components |
|----------------------------------|----------|---------|---------|----------|---------------------------------|-----------------------------------------------|-------------------------|
| <b>Figure 1 c</b>                | 0.94118  | 0.96012 | 0.84209 | ***      | 1                               | < 5e-04 (0/2000)                              | 2                       |
| <b>Supplemental 1 c (I v D)</b>  | 1        | 0.98326 | 0.93863 | ***      | 1                               | 0.015 (30/2000)                               | 2                       |
| <b>Supplemental 1 c (I v S)</b>  | 0.90909  | 0.96613 | 0.81582 | ***      | 1                               | 0.0215 (43/2000)                              | 2                       |
| <b>Figure 1 d</b>                | 1        | 0.99837 | 0.9975  | ***      | 1                               | < 5e-04 (0/2000)                              | 2                       |
| <b>Supplemental 1 d (I v D)</b>  | 1        | 0.99827 | 0.99454 | ***      | 1                               | 0.0015 (3/2000)                               | 2                       |
| <b>Supplemental 1 d (I v S)</b>  | 1        | 0.99966 | 0.99913 | ***      | 1                               | 0.0265 (53/2000)                              | 2                       |
| <b>Figure 3 c</b>                | 0.95455  | 0.96835 | 0.91724 | ***      | 1,1,1,0.75<br>(DD3 v<br>others) | < 5e-04 (0/2000)                              | 3                       |
| <b>Supplemental 3 c (I v D1)</b> | 1        | 0.98133 | 0.93997 | ***      | 1                               | 0.0485 (97/2000)                              | 2                       |
| <b>Supplemental 3 c (I v D2)</b> | 1        | 0.97815 | 0.93086 | ***      | 1                               | 0.0385 (77/2000)                              | 2                       |
| <b>Supplemental 3 c (I v D3)</b> | 0.90909  | 0.99201 | 0.87501 | ***      | 1                               | 0.22 (440/2000)                               | 2                       |
| <b>Figure 3 d</b>                | 1        | 0.98284 | 0.96574 | ***      | 1,1,1,0.75<br>(DD3 v<br>others) | < 5e-04 (0/2000)                              | 2                       |
| <b>Supplemental 3 d (I v D1)</b> | 1        | 0.99888 | 0.98962 | ***      | 1                               | 0.0065 (13/2000)                              | 2                       |
| <b>Supplemental 3 d (I v D2)</b> | 1        | 0.99687 | 0.992   | ***      | 1                               | 0.0185 (37/2000)                              | 2                       |

|                                  |   |         |         |     |   |                   |   |
|----------------------------------|---|---------|---------|-----|---|-------------------|---|
| <b>Supplemental 3 d (I v D3)</b> | 1 | 0.99702 | 0.99069 | *** | 1 | 0.0515 (103/2000) | 2 |
|----------------------------------|---|---------|---------|-----|---|-------------------|---|

\*\*\* p-val <1e-6 from 10-fold CV-ANOVA from a linear regression of same group/metabolite comparison, using caret [Max Kuhn (2022). caret: Classification and Regression Training. R package version 6.0-92].

#### References:

E. Szymanska E. Saccenti A. K. Smilde J. A. Westerhuis Double-check: validation of diagnostic statistics for PLS-DA models in metabolomics studies *Metabolomics* (2012) 8:S3–S16 DOI 10.1007/s11306-011-0330-3

Xia, J., Psychogios, N., Young, N. and Wishart, D.S. (2009) MetaboAnalyst: a web server for metabolomic data analysis and interpretation. *Nucl. Acids Res.* 37, W652-660.
